# Supplementary material for: Differential Gene Expression and Epiregulation of Alpha Zein Gene Copies in Maize Haplotypes
Source: PubMed Central journal article supplement (PMC3121756; doi:10.1371/journal.pgen.1002131), 2011-06-23

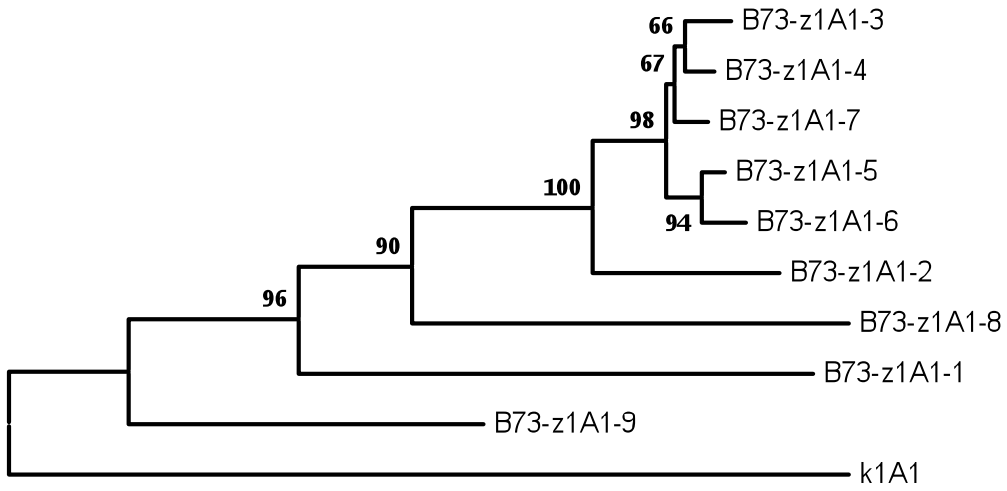

0.02

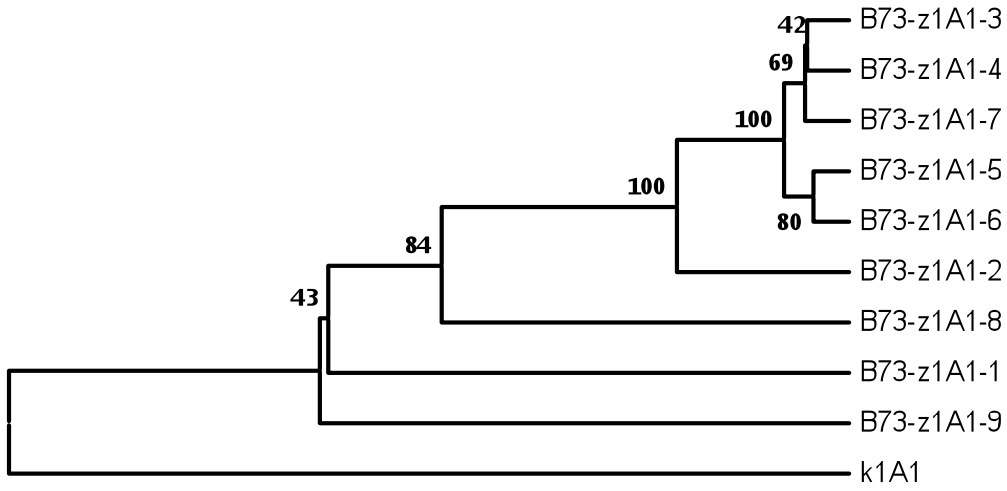

0.10 0.08 0.06 0.04 0.02 0.00

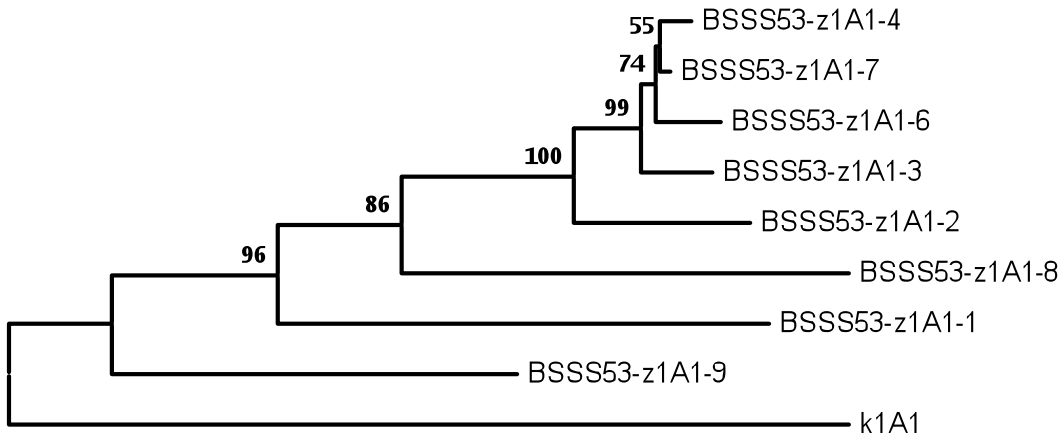

0.02

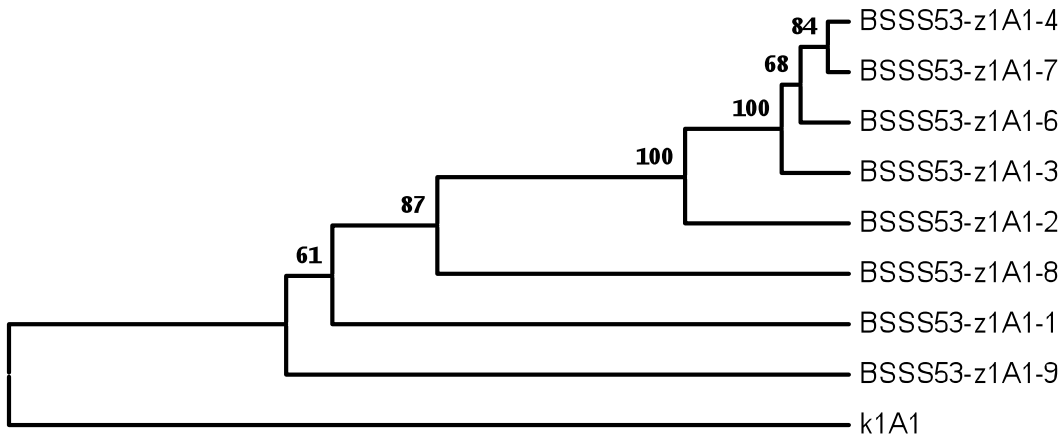

0.10 0.08 0.06 0.04 0.02 0.00

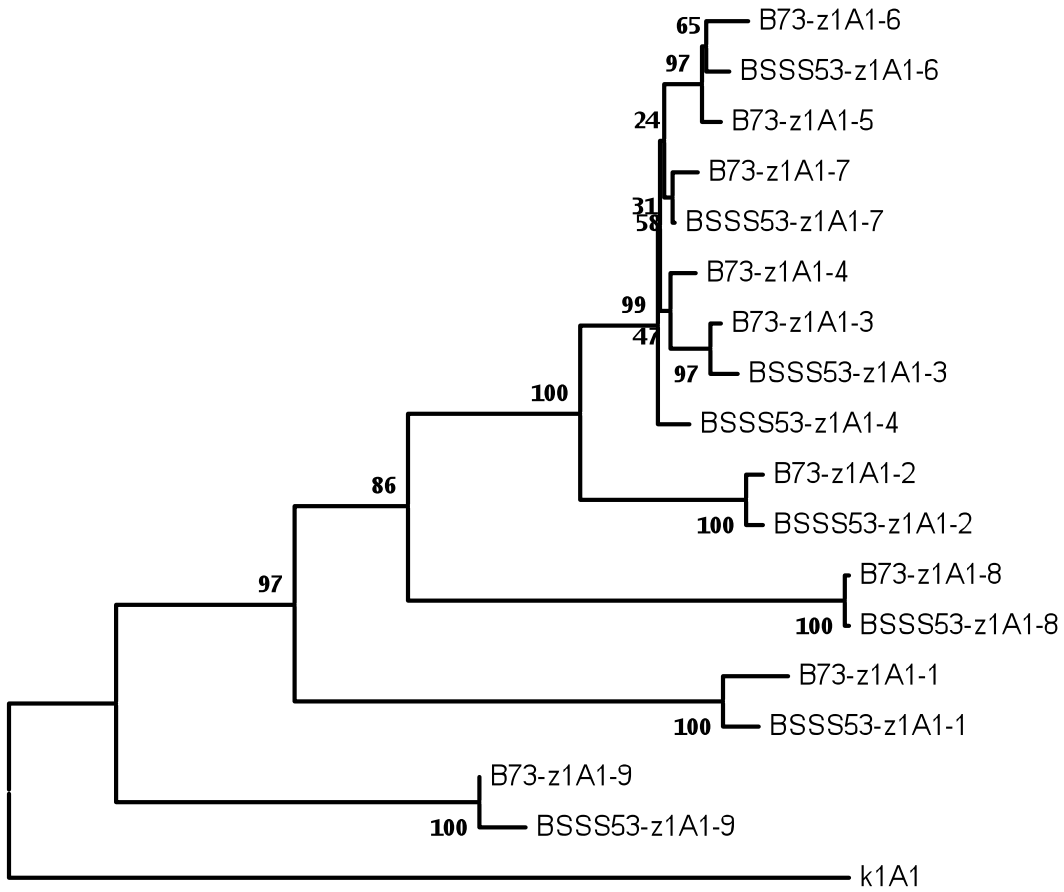

0.02

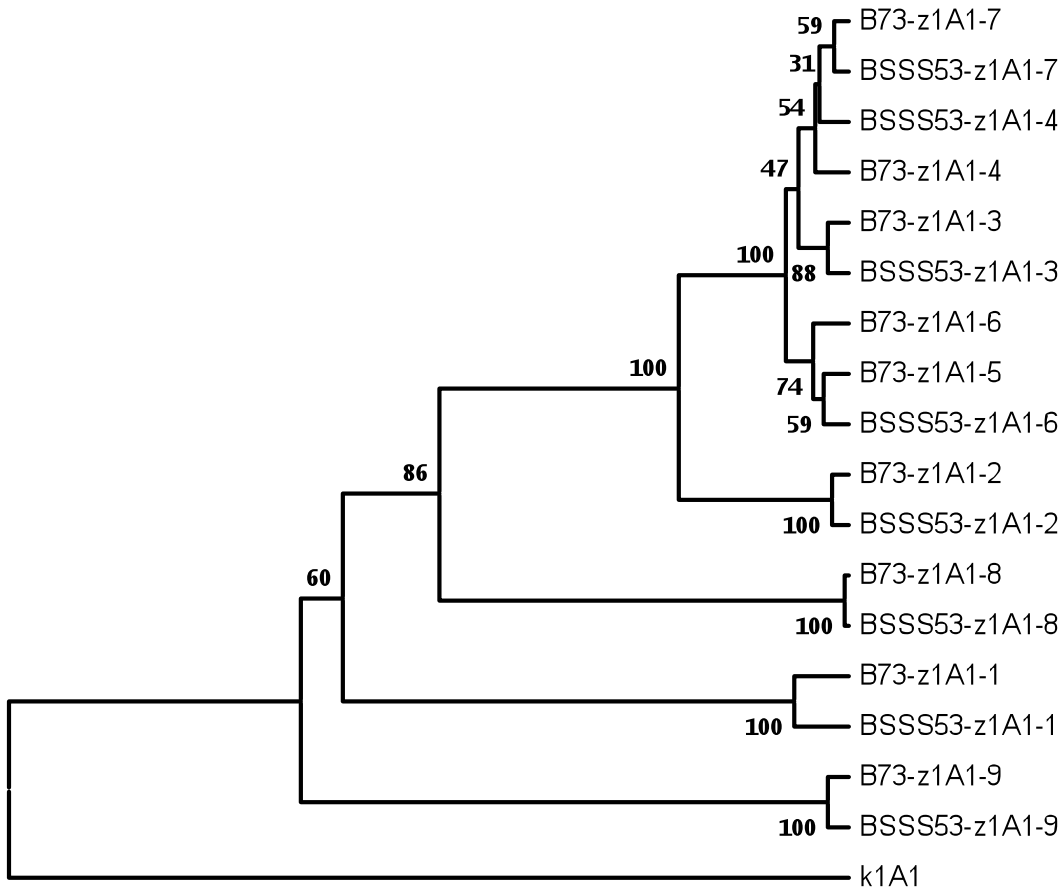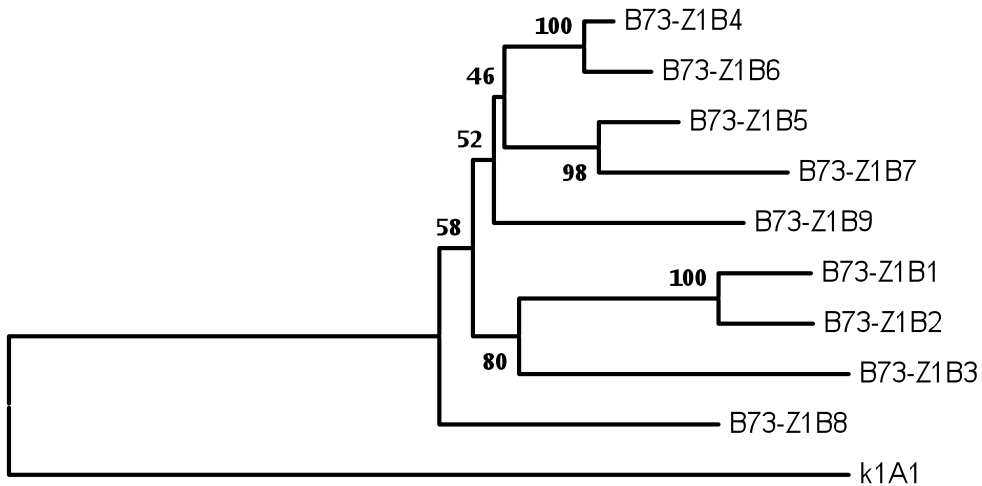

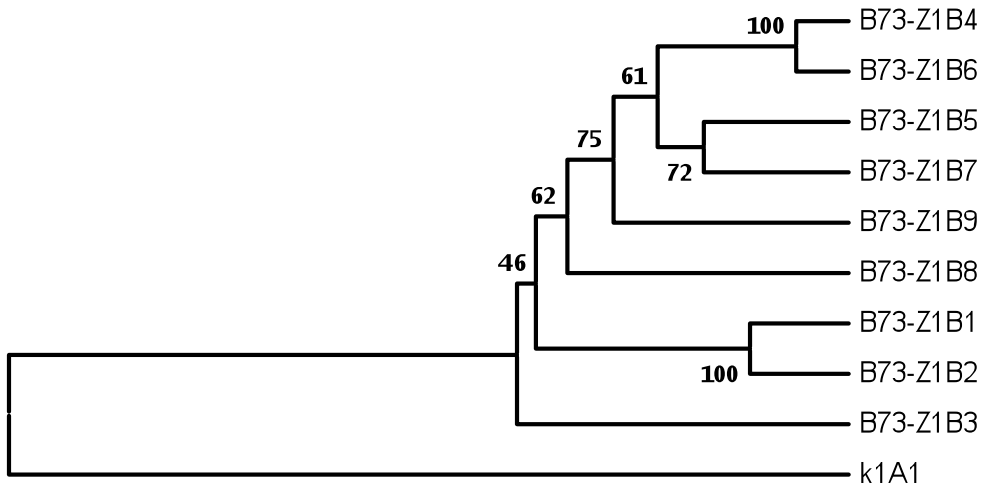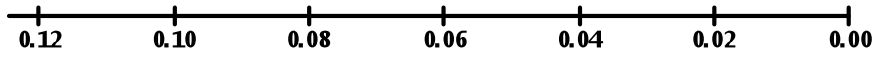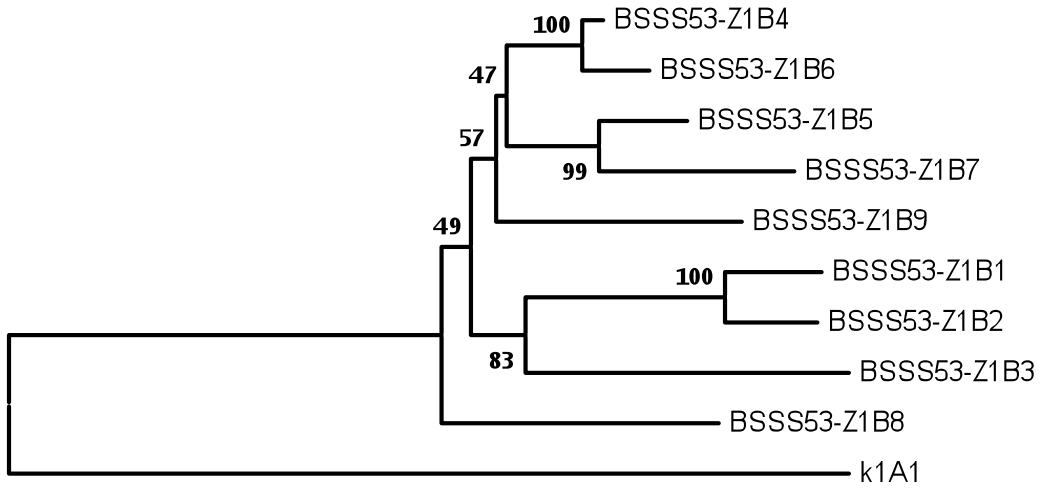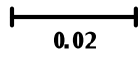

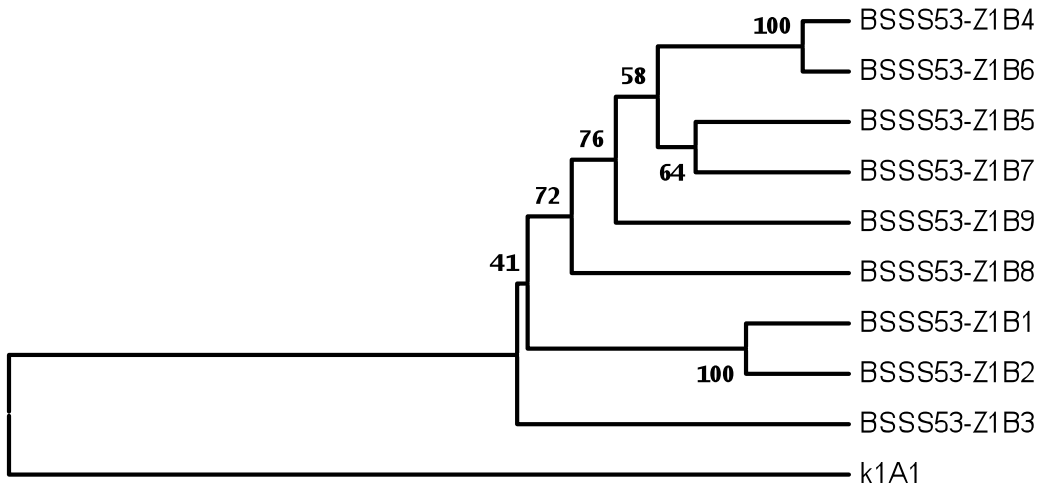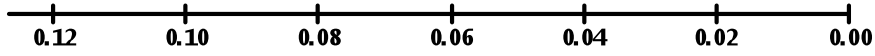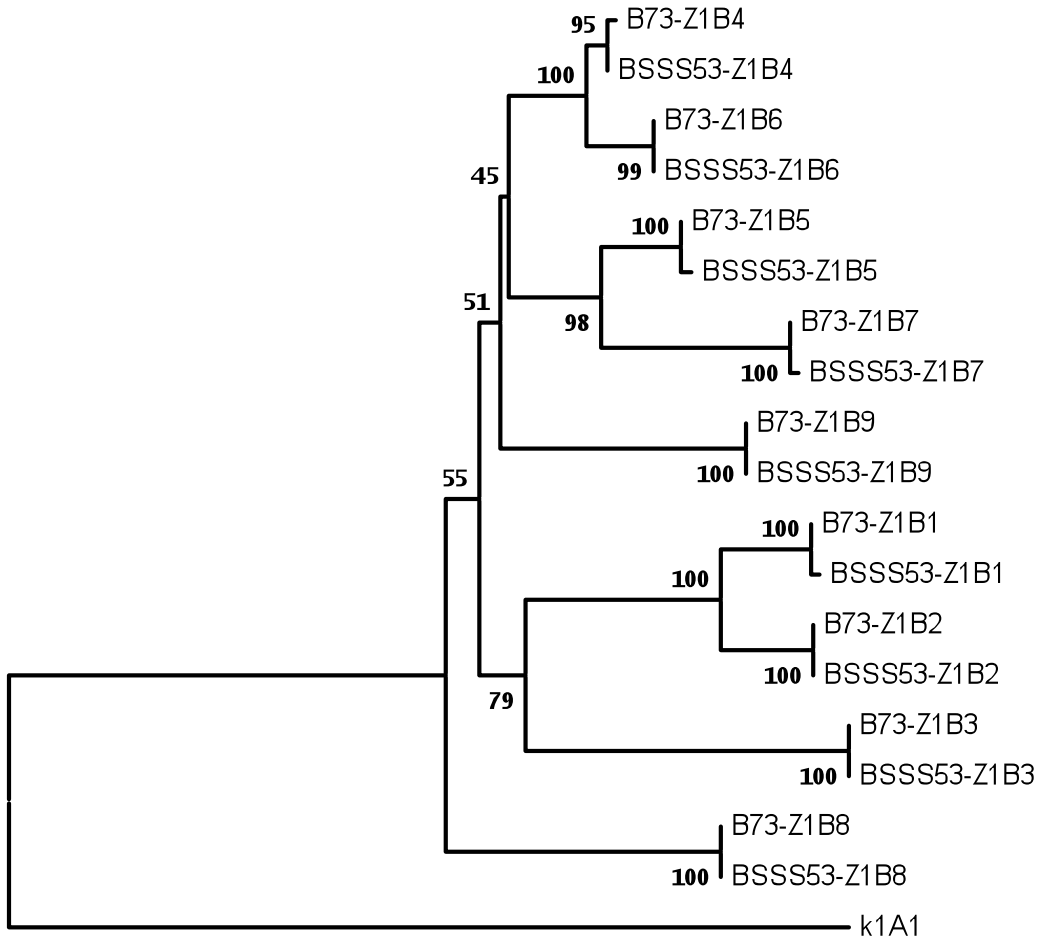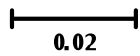

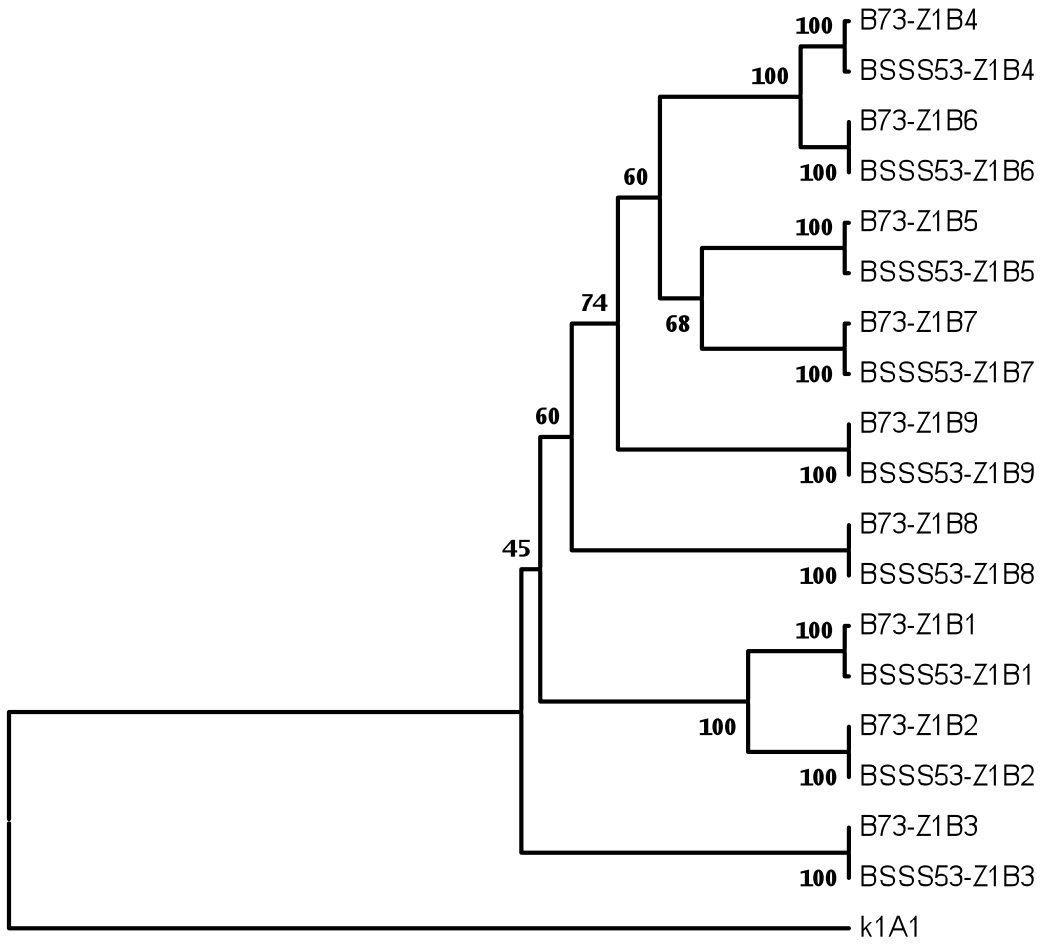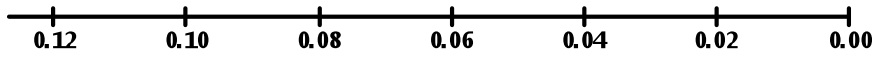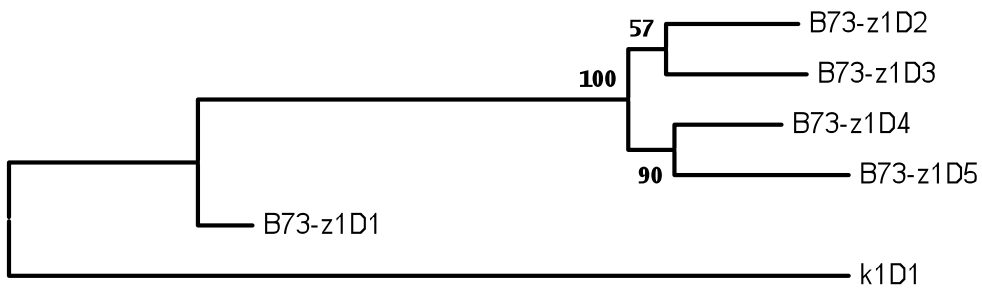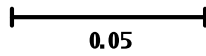

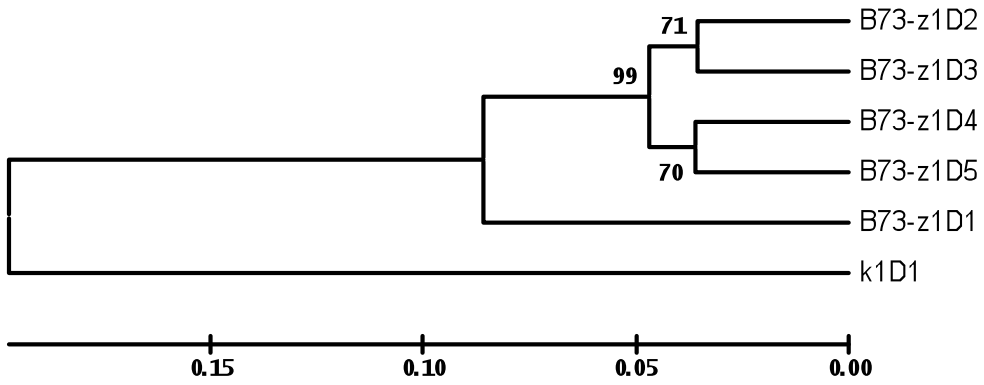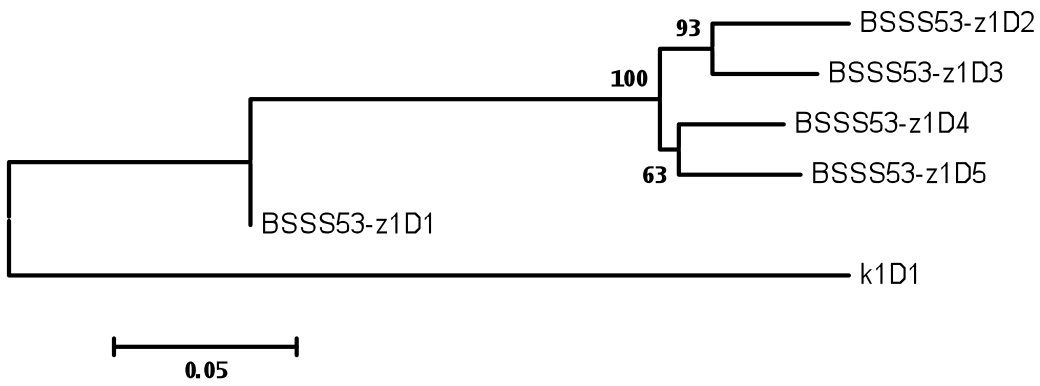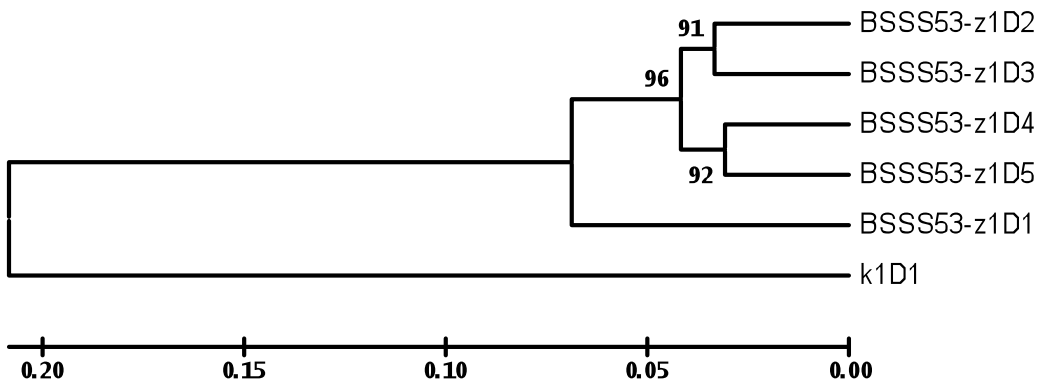



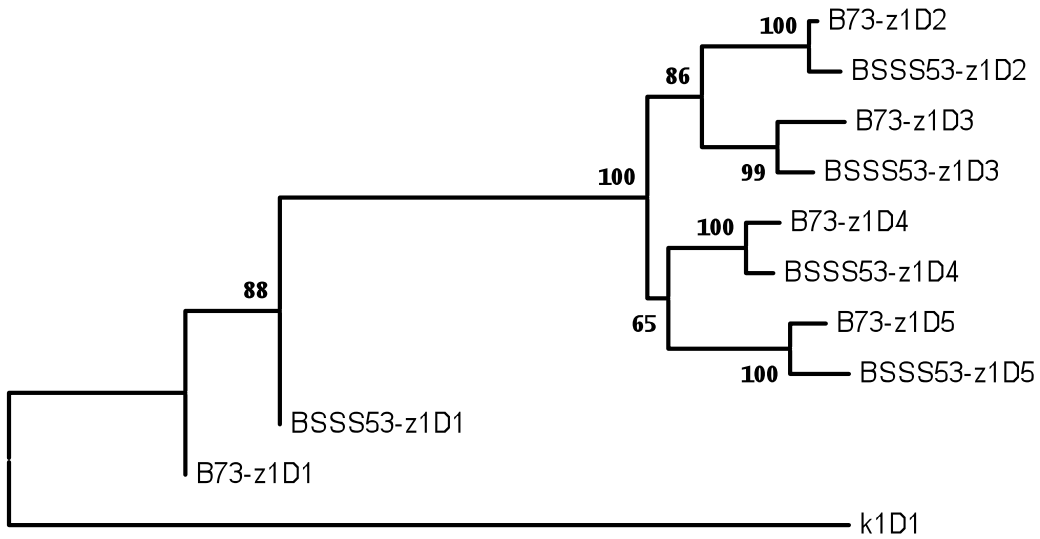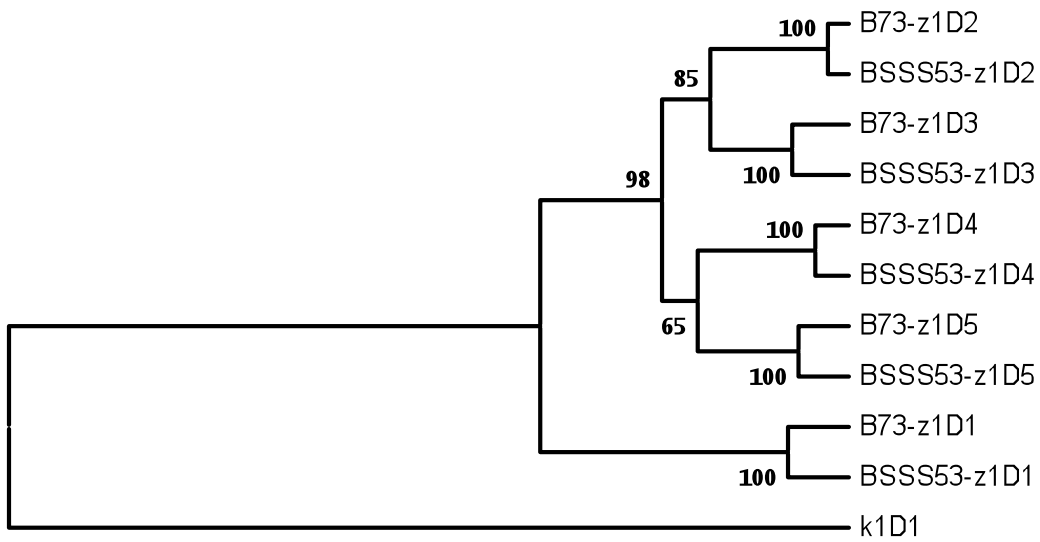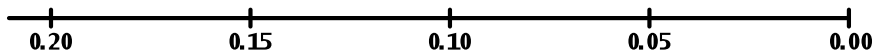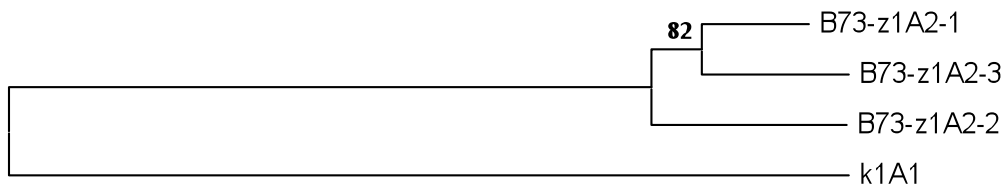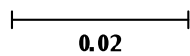

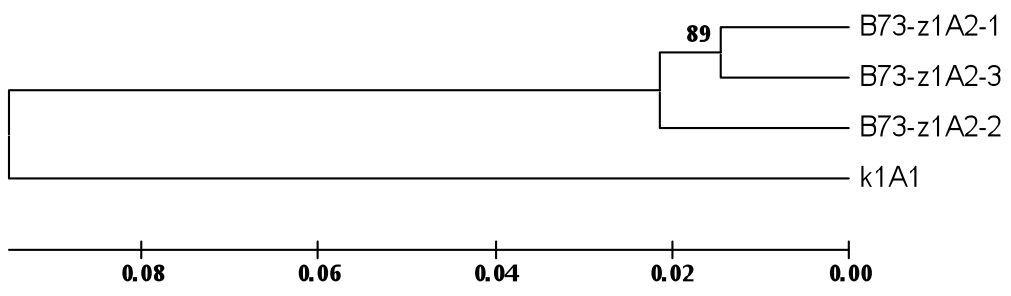

Supplement: pgen.1002131.s001.pdf [file pgen.1002131.s001.pdf]
