# Supplementary material for: Differential Gene Expression and Epiregulation of Alpha Zein Gene Copies in Maize Haplotypes
Source: PubMed Central journal article supplement (PMC3121756; doi:10.1371/journal.pgen.1002131), 2011-06-23
Supplement: pgen.1002131.s002.pdf [file pgen.1002131.s002.pdf]

| Zein copy     | B73      | BSSS53    |
|---------------|----------|-----------|
| <i>zIA1-1</i> | GTGTAAAG | GTGTAAAG  |
| <i>zIA1-2</i> | GTGTAAAG | GTGTAAAG  |
| <i>zIA1-3</i> | GTGTAAAG | GTGTAAAG  |
| <i>zIA1-4</i> | GTGTAAAG | GTGTAAAG  |
| <i>zIA1-5</i> | GTGTAAAG | GTGTAAAG  |
| <i>zIA1-6</i> | GTGTAAAG | n/a       |
| <i>zIA1-7</i> | GTGTAAAG | GTGTAAAG  |
| <i>zIA1-8</i> | GTGTAAAG | GTGTAAAG  |
| <i>zIA1-9</i> | GTGTAAAG | GTGTAAAG  |
| <i>zIA2-1</i> | GTGTAAAG | GTGTAAAG  |
| <i>zIA2-2</i> | GTGTAAAG | GTGTAAAG  |
| <i>zIA2-3</i> | TTGTAAAG | TTGTAAAG  |
| <i>zIB1</i>   | GTGTGAAG | GTGTGAAG  |
| <i>zIB2</i>   | GTGTGAAG | GTGTGAAG  |
| <i>zIB3</i>   | GTGTGAAG | GTGTGAAG  |
| <i>zIB4</i>   | GTGTAAAG | GTGTAAAG  |
| <i>zIB5</i>   | GTGTAAAG | GTGTAAAG  |
| <i>zIB6</i>   | GTGTAAAG | GTGTAAAG  |
| <i>zIB7</i>   | GTGTAAAG | GTGTAAAG  |
| <i>zIB8</i>   | GTGTAAAG | GTGTAAAG  |
| <i>zIB9</i>   | GTGAAAAG | GTGAAAAG  |
| <i>zID1</i>   | CTGTCTAA | CTAATCCAA |
| <i>zID2</i>   | GTGTAAAG | ATGTAAAG  |
| <i>zID3</i>   | GTGTAAAG | GTGTAAAG  |
| <i>zID4</i>   | GTGTAAAG | GTGTAAAG  |
| <i>zID5</i>   | GCGTGAAC | GTGTAAAG  |
