# Supplementary material for: Differential Gene Expression and Epiregulation of Alpha Zein Gene Copies in Maize Haplotypes
Source: PubMed Central journal article supplement (PMC3121756; doi:10.1371/journal.pgen.1002131), 2011-06-23

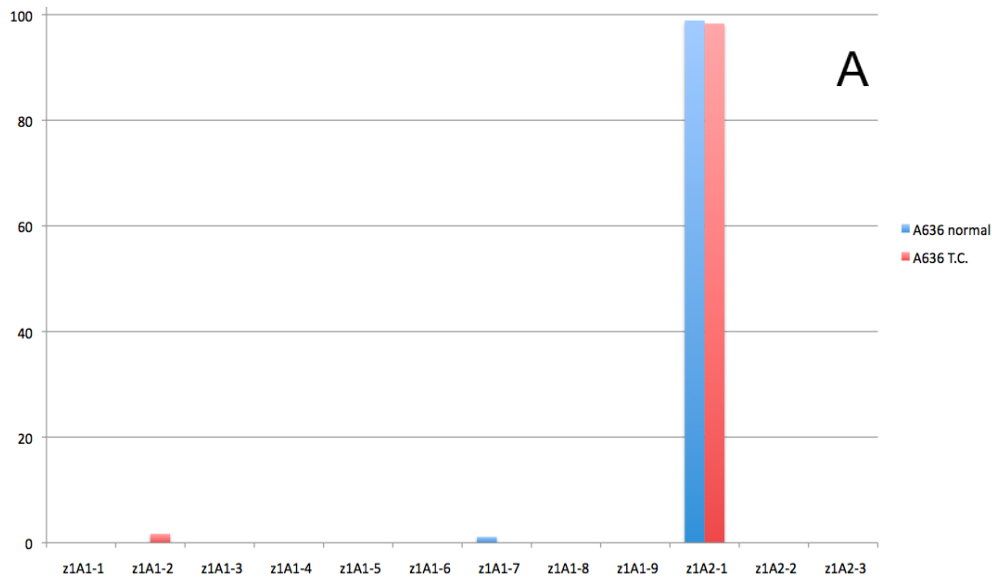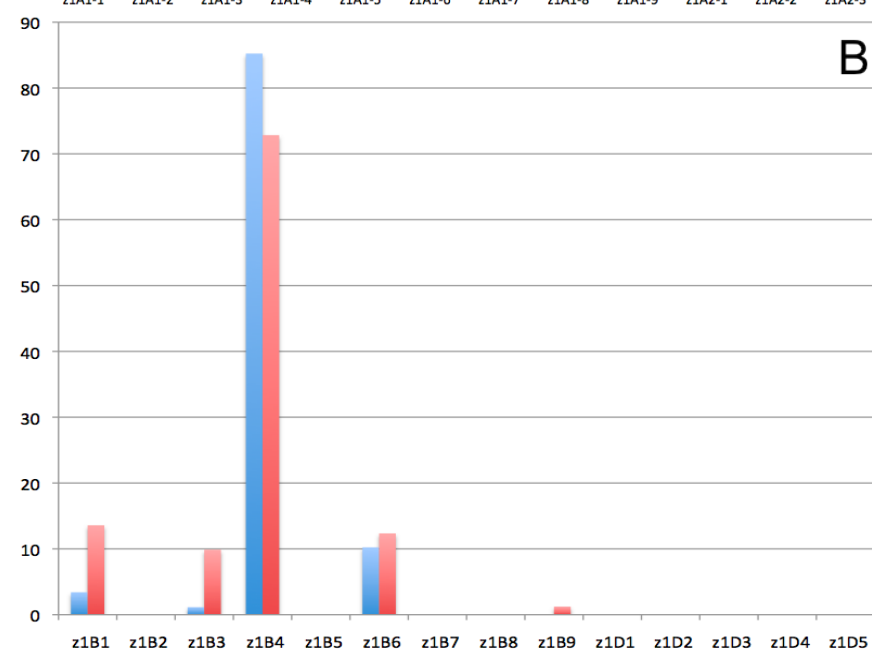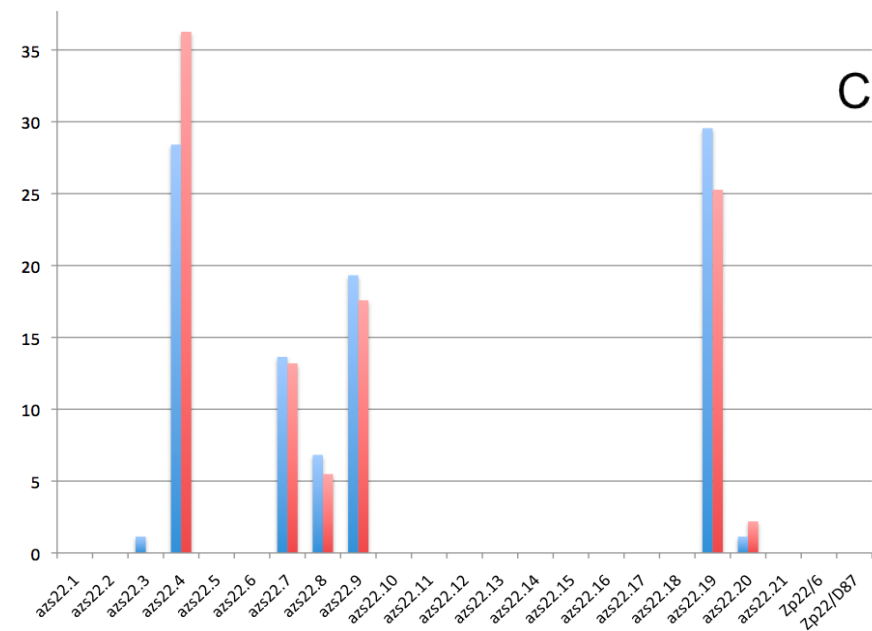

Supplement: pgen.1002131.s003.pdf [file pgen.1002131.s003.pdf]
